# Supplementary material
Source: MDPI journal article supplement (https://www.mdpi.com/2254-9625/14/2/19)
Supplement: s1 [file s1]

**Supplementary file**

**Table S1.** Results of the cognitive functions comparing three groups (CG, AT and ACT) at the four assessments (baseline, W4, W8 and W12)

| Groups<br>Tasks                                       | Control<br>group<br>(n = 14) | Aerobic<br>Training<br>(n = 15) | Aerobic-<br>Cognitive<br>Training<br>(n = 15) | Kruskal-<br>Wallis<br>Analysis | Post Hoc<br>Comparison<br>AT vs. ACT |
|-------------------------------------------------------|------------------------------|---------------------------------|-----------------------------------------------|--------------------------------|--------------------------------------|
|                                                       | M (SD)                       | M (SD)                          | M (SD)                                        | H                              | H                                    |
| <b>Cognitive Functions Baseline</b>                   |                              |                                 |                                               |                                |                                      |
| Stroop interference score                             | 7.85 (0.77)                  | 7.60 (0.80)                     | 7.20 (0.83)                                   | 4.21                           | 4.21                                 |
| Hanoi execution time                                  | 75.07(8.57)                  | 74.86(10.51)                    | 72.73 (8.42)                                  | 1.15                           | 1.15                                 |
| Hanoi number of moves                                 | 10.50(3.63)                  | 10.79 (3.49)                    | 10.26 (3.49)                                  | 0.13                           | 0.13                                 |
| Digit Span Forward                                    | 3.47 (0.21)                  | 3.52 (0.14)                     | 3.50 (0.09)                                   | 0.56                           | 0.56                                 |
| Digit Span backward                                   | 3.28 (0.18)                  | 3.30 (0.16)                     | 3.37 (0.16)                                   | 2.05                           | 2.05                                 |
| <b>Cognitive Functions after 4 weeks (W4)</b>         |                              |                                 |                                               |                                |                                      |
| Stroop interference score                             | 8.21 (0.69)                  | 6.13 (0.74)                     | 5.86 (0.91)                                   | 26.21***                       | 26.21                                |
| Hanoi execution time                                  | 75.28(8.31)                  | 63.46 (9.57)                    | 58.46 (10.50)                                 | 14.60***                       | 14.60                                |
| Hanoi number of moves                                 | 11 (3.59)                    | 9.80 (3.54)                     | 8.40 (2.89)                                   | 4.14                           | 4.14                                 |
| Digit Span Forward                                    | 3.44 (0.17)                  | 3.61 (0.14)                     | 3.77 (0.07)                                   | 24.15***                       | 24.15                                |
| Digit Span backward                                   | 3.27 (0.18)                  | 3.44 (0.08)                     | 3.61 (0.09)                                   | 25.06***                       | 25.06**                              |
| <b>Cognitive Functions after 8 weeks (W8)</b>         |                              |                                 |                                               |                                |                                      |
| Stroop interference score                             | 8.78 (1.52)                  | 5.33 (0.61)                     | 4.33 (0.48)                                   | 32.46***                       | 32.46**                              |
| Hanoi execution time                                  | 81.35(7.55)                  | 51.53 (8.02)                    | 42.46 (8.25)                                  | 31.01***                       | 31.01*                               |
| Hanoi number of moves                                 | 11.50(3.48)                  | 7.93 (2.46)                     | 7.00 (0.00)                                   | 17.21***                       | 17.21*                               |
| Digit Span Forward                                    | 3.38 (0.16)                  | 3.92 (0.10)                     | 4.00 (0.00)                                   | 35.74***                       | 35.74*                               |
| Digit Span backward                                   | 3.30 (0.23)                  | 3.62 (0.10)                     | 3.78 (0.14)                                   | 27.96***                       | 27.96**                              |
| <b>Cognitive Functions after 4-week of rest (W12)</b> |                              |                                 |                                               |                                |                                      |
| Stroop interference score                             | 9.21 (0.97)                  | 5.26 (0.79)                     | 4.26 (0.45)                                   | 34.10***                       | 34.10**                              |
| Hanoi execution time                                  | 81.07(8.64)                  | 50.13 (6.85)                    | 42.93 (8.38)                                  | 30.51***                       | 30.51                                |
| Hanoi number of moves                                 | 11.00(3.59)                  | 7.46 (1.80)                     | 7.00 (0.00)                                   | 16.80***                       | 16.80                                |
| Digit Span Forward                                    | 3.34 (0.18)                  | 3.90 (0.10)                     | 3.98 (0.05)                                   | 34.22***                       | 34.22                                |
| Digit Span backward                                   | 3.24 (0.16)                  | 3.64 (0.15)                     | 3.80 (0.13)                                   | 31.07***                       | 31.07                                |

M = mean; SD = standard deviation; \*  $p < 0.05$ ; \*\*  $p < 0.01$ ; \*\*\* $p < 0.001$ .

**Table S2.** Performances in different tasks of the three groups (CG, AT, and ACT) before and after activities (Reading, Pedaling, and Combined) and follow-up 1 month

| Training duration                        | Baseline     | W4            | W8           | Friedman<br>analysis | W12          | W8vsW12 |
|------------------------------------------|--------------|---------------|--------------|----------------------|--------------|---------|
| Groups                                   | M (SD)       | M (SD)        | M (SD)       | Khi <sup>2</sup>     | M (SD)       | z       |
| <b>Control group (n = 14)</b>            |              |               |              |                      |              |         |
| Stroop interference score                | 7.85 (0.77)  | 8.21 (0.69)   | 8.78 (1.52)  | 6.95                 | 9.21 (0.97)  | -0.97   |
| Hanoi execution time                     | 75.07 (8.57) | 75.28 (8.31)  | 81.35 (7.55) | 7.42                 | 81.07 (8.64) | -0.36   |
| Hanoi number of moves                    | 10.50 (3.63) | 11 (3.59)     | 11.5 (3.48)  | 1.20                 | 11.00 (3.59) | -1.00   |
| Digit Span Forward                       | 3.47 (0.21)  | 3.44 (0.17)   | 3.38 (0.16)  | 1.55                 | 3.34 (0.18)  | -0.78   |
| Digit Span backward                      | 3.28 (0.18)  | 3.27 (0.18)   | 3.30 (0.23)  | 0.30                 | 3.24 (0.16)  | -0.73   |
| <b>Aerobic Training group (n= 15)</b>    |              |               |              |                      |              |         |
| Stroop interference score                | 7.60 (0.80)  | 6.13 (0.74)   | 5.33 (0.61)  | 26.53***             | 5.26 (0.79)  | -0.28   |
| Hanoi execution time                     | 74.86(10.51) | 63.46 (9.57)  | 51.53 (8.02) | 25.12***             | 50.13 (6.85) | -1.66   |
| Hanoi number of moves                    | 10.79 (3.49) | 9.8 (3.54)    | 7.93 (2.46)  | 5.60**               | 7.46 (1.80)  | -1.00   |
| Digit Span Forward                       | 3.52 (0.14)  | 3.61 (0.14)   | 3.92 (0.10)  | 23.81***             | 3.90 (0.10)  | -0.38   |
| Digit Span backward                      | 3.30 (0.16)  | 3.44 (0.08)   | 3.62 (0.10)  | 22.33***             | 3.64 (0.15)  | -0.45   |
| <b>Aerobic-Cognitive Training (n=15)</b> |              |               |              |                      |              |         |
| Stroop interference score                | 7.20 (0.83)  | 5.86 (0.91)   | 4.33 (0.48)  | 26.56***             | 4.26 (0.45)  | -1.00   |
| Hanoi execution time                     | 72.73 (8.42) | 58.46 (10.50) | 42.46 (8.25) | 30.00***             | 42.93 (8.38) | -0.51   |
| Hanoi number of moves                    | 10.26 (3.49) | 8.4 (2.89)    | 7.00 (0.00)  | 9.25**               | 7.00 (0.00)  | -1.00   |
| Digit Span Forward                       | 3.50 (0.09)  | 3.77 (0.07)   | 4.00 (0.00)  | 30.00***             | 3.98 (0.05)  | -1.00   |
| Digit Span backward                      | 3.37 (0.16)  | 3.61 (0.09)   | 3.78 (0.14)  | 25.32***             | 3.80 (0.13)  | -0.38   |

M = mean; SD = standard deviation; \*  $p < 0.05$ ; \*\*  $p < 0.01$ ; \*\*\* $p < 0.001$
